# Supplementary material for: Methylome Diversification through Changes in DNA Methyltransferase Sequence Specificity
Source: PLoS Genet. 2014 Apr 10;10(4):e1004272. doi: 10.1371/journal.pgen.1004272 (PMC3983042; doi:10.1371/journal.pgen.1004272)
Supplement: Table S2 — Methylome results. (XLSX) [file pgen.1004272.s006.xlsx]

## Sheet: Table S2
Table S2. Methylome results
	#1b			#2
Motifa	Methylated copy #	%		Methylated copy #	%	Copy #	Gene name	Type, subunit	Locus tag	Comments
(A) P12
5'-CTANNNNNNNNTTC	736	94.2382		752	96.2868	781	-	I S (Group 2)	HPP12_0797	TRD combination: c, a
5'-GAANNNNNNNNTAG	734	93.9821		749	95.9027	781	-	I S (Group 2)	HPP12_0797	Complement with 5'-CTANNNNNNNNTTC
5'-GRNAANNNNNNNTAYC	173	91.5344		185	97.8836	189	-	I S (Group 3)	HPP12_1508	TRD combination: m, n
5'-GRTANNNNNNNTTNYC	184	97.3545		185	97.8836	189	-	I S (Group 3)	HPP12_1508	Complement with 5'-GRNAANNNNNNNTAYC
5'-GATC	10058	95.1381		10330	97.7109	10572	M.hpyAIII	II M (5’-GATC)	HPP12_0095
5'-GAAGG	1268	95.0525		1300	97.4513	1334	M.hpyAV	II M (5’-GAAGG)	HPP12_0048
5'-GTAC	253	95.1128		260	97.7444	266	M.hpyAXII	II M (5’-GTAC)	HPP12_0510
5'-TCNNGA	3749	94.196		3815	95.8543	3980	-	II M (5’-TCNNGA)	HPP12_1052
5'-GAATTC	334	94.3503		339	95.7627	354	-	II M (5’-GAATTC)	HPP12_1389
5'-ATTAAT	895	93.2292		892	92.9167	960	M.hpyAVII	II M (5’-ATTAAT)	HPP12_0488
5'-GAGG	4527	92.9951		4671	95.9532	4868	M1.hpyAVI	II M1(5’-GAGG)	HPP12_0044
5'-CATG	12332	83.4145		12917	87.3715	14784	M.hpyAI	II M (5’-CATG)	HPP12_1173
5'-GNGRGA	3774	93.9975		3885	96.7621	4015			Unassigned
5'-GACC	2443	93.8172		2521	96.8126	2604			Unassigned
5'-GCGCGC	106	20.9486		115	22.7273	506			Unassigned
5'-TCGA	214	36.7698		214	36.7698	582	M.hpyAX	III M (5’-TCGA)	HPP12_0259	Untruncated ORF but rare methylation. Explained by 5'-GATC
N/D							-	II M (5’-CCGG)	HPP12_0262
N/D							M.hpy99III	II M (5’-GCGC)	HPP12_1087
N/D							-	I S (Group 1)	HPP12_0434
N/D							M.hpyAIX	II M (5’-GTNNAC)	HPP12_0908
N/D							-	III M	HPP12_1365
N/D							-	IIG RM	HPP12_1494
N/D							-	III M	HPP12_1497
N/D							-	IIG S	HPP12_1449
N/D							-	IIG RM	HPP12_1450
N/D							M2.hpyAVI	II M2 (5’-CCTC)	HPP12_0045
N/D							-	III M	HPP12_1377
N/D							-	II M (5’-TGCA)	HPP12_1523
Truncated genes: I S(HPP12_0849), II M (5'-GANTC)(HPP12_1318), IIG RM(HPP12_0680-0682), IIG RM(HPP12_1319, unannoteted region between HPP12_1353 and HPP12_1354), II M (5'-ACGT)(HPP12_0491), III M (5'-GCAG)(HPP12_600)
(B) F16
5'-CTANNNNNNNNTTG	775	98.3503		779	98.8579	788	-	I S (Group 2)	HPF16_0513	TRD combination:a, h
5'-CAANNNNNNNNTAG	780	98.9848		780	98.9848	788	-	I S (Group 2)	HPF16_0513	Complement with 5'-CTANNNNNNNNTTG
5'-VTAYNNNNNNNTTG	922	98.5043		924	98.7179	936	-	I S (Group 2)	HPF16_0572	TRD combination:d, h
5'-CAANNNNNNNRTAB	917	97.9701		925	98.8248	936	-	I S (Group 2)	HPF16_0572	Complement with 5'-VTAYNNNNNNNTTG
5'-TCGA	495	99.3976		494	99.1968	498	M.hpyAX	III M (5’-TCGA)	HPF16_0267
5'-GANTC	5318	99.1424		5341	99.5712	5364	M.hpyAIV	II M (5’-GANTC)	HPF16_0047
5'-GATC	9940	99.1422		9990	99.6409	10026	M.hpyAIII	II M (5’-GATC)	HPF16_0105
5'-GTNNAC	508	98.8327		512	99.6109	514	M.hpyAIX	II M (5’-GTNNAC)	HPF16_0891
5'-TCNNGA	3734	98.5224		3759	99.1821	3790	-	II M (5’-TCNNGA)	HPF16_1028
5'-TGCA	10945	97.9857		11005	98.5228	11170	-	II M (5’-TGCA)	HPF16_1447
5'-GTAC	203	97.5962		208	100	208	M.hpyAXII	II M (5’-GTAC)	HPF16_0851
5'-ATTAAT	856	96.614		871	98.307	886	M.hpyAVII	II M (5’-ATTAAT)	HPF16_0459
5'-CTNAG	5192	95.022		5313	97.2365	5464	M.hpyHI	II M (5’-CTNAG)	HPF16_0320
5'-CCGG	2991	88.596		3123	92.5059	3376	-	II M (5’-CCGG)	HPF16_0270
5'-CCNNGG	1913	85.0979		2001	89.0125	2248	M.hpy99IV	II M (5’-CCNNGG)	HPF16_0699
5'-CATG	13283	93.2271		13358	93.7535	14248	M.hpyAI	II M (5’-CATG)	HPF16_1145
5'-CCATC	790	35.3309		783	35.0179	2236	-	II M (5’-CCATC)	HPF16_1396
5'-GGCAA	3320	98.3704		3348	99.2	3375	-	III M	HPF16_0033
5'-CAGC	7106	99.0383		7146	99.5958	7175			Unassigned
5'-GATGG	2210	98.8372		2227	99.5975	2236			Unassigned
5'-CGRAG	1494	98.8095		1497	99.0079	1512			Unassigned
5'-GCRGA	2294	98.5819		2306	99.0976	2327			Unassigned
5'-HGATGCAB	110	56.1224		124	63.2653	196			Unassigned
N/D							M1.hpyAVI	II M1(5’-GAGG)	HPF16_0057
N/D							-	I S (Group 1)	HPF16_0441
N/D							M.hpy99III	II M (5’-GCGC)	HPF16_1063
N/D							-	I S (Group 3)	HPF16_1429
N/D							-	IIG RM	HPF16_1415
N/D							-	III M	HPF16_1417
N/D							-	IIG RM	HPF16_1369
N/D							-	III M	HPF16_1296
N/D							-	II M (5’-CCATC)	HPF16_1397
N/D							-	II M (5'-CCTC)	HPF16_1273
Truncated genes: IIG RM(HPF16_0676-0677), IIG RM(HPF16_0045-0046), IIG S(HPF16_1367-1368), II M(5'-CCTC)(HPF16_0058-0059), II M(5'-HPF16_0463,0479)
(C) F30
5'-GRNAANNNNNNNTAYG	178	93.6842		183	96.3158	190	-	I S (Group 3)	HPF30_1299	TRD combination: m, k
5'-CRTANNNNNNNTTNYC	181	95.2632		186	97.8947	190	-	I S (Group 3)	HPF30_1299	Complement with 5'-GRNAANNNNNNNTAYG
5'-TCGA	505	95.6439		510	96.5909	528	M.hpyAX	III M (5’-TCGA)	HPF30_1036
5'-GTNNAC	502	96.1686		512	98.0843	522	M.hpyAIX	II M (5’-GTNNAC)	HPF30_0429
5'-GATC	9702	96.0024		9863	97.5955	10106	M.hpyAIII	II M (5’-GATC)	HPF30_1171
5'-TCNNGA	3685	94.7301		3762	96.7095	3890	-	II M (5’-TCNNGA)	HPF30_0302
5'-GAGG	4294	94.7485		4356	96.1165	4532	M1.hpyAVI	II M1(5’-GRRG)	HPF30_1250
5'-TGCA	10605	94.3673		10762	95.7644	11238	-	II M (5’-TGCA)	HPF30_1424
5'-GATGG	2093	93.4375		2116	94.4643	2240	-	II M (5’-CCATC)	HPF30_1367
5'-GAATTC	284	90.4459		290	92.3567	314	-	II M (5’-GAATTC)	HPF30_1285
5'-CTNAG	4929	89.1643		5036	91.0999	5528	M.hpyHI	II M (5’-CTNAG)	HPF30_0982
5'-ATTAAT	729	85.5634		726	85.2113	852	M.hpyAVII	II M (5’-ATTAAT)	HPF30_0843
5'-CATG	12338	86.4369		12492	87.5158	14274	M.hpyAI	II M (5’-CATG)	HPF30_0185
5'-CCGG	1526	45.3357		1384	41.1171	3366	-	II M (5’-CCGG)	HPF30_1033	Untruncated ORF but intermediate methylation.
5'-GGCAA	3147	93.6886		3252	96.8145	3359	-	III M	HPF30_0034
5'-CANNNNNGTC	833	94.7668		835	94.9943	879			Unassigned
5'-GACNNNNNTG	824	93.7429		838	95.3356	879			Unassigned	Complement with 5'-CANNNNNGTC
5'-AGGAG	1381	94.8489		1426	97.9396	1456			Unassigned
5'-GATGCA	300	66.2252		272	60.0442	453			Unassigned
5'-CAAGWAG	235	46.2598		259	50.9843	508			Unassigned	Part of 5'-CNNGNAG?
5'-CRTGHAG	374	74.502		386	76.8924	502			Unassigned	Part of 5'-CNNGNAG?
5'-CTNGNAG	1182	95.3995		1205	97.2559	1239			Unassigned	Part of 5'-CNNGNAG?
5'-CCDGNAG	673	91.8145		694	94.6794	733			Unassigned	Part of 5'-CNNGNAG?
N/D							-	I S (Group 1)	HPF30_0860
N/D							-	IIG RM	HPF30_0661
N/D							-	I S (Group 2)	HPF30_0484
N/D							M.hpy99III	II M (5’-GCGC)	HPF30_0268
N/D							-	I S (Group 3)	HPF30_1405
N/D							-	IIG RM	HPF30_1390
N/D							-	IIG RM	HPF30_1340
N/D							M2.hpyAVI	II M2 (5’-CCTC)	HPF30_1249
N/D							M.hpy99XI	II M (5’-ACGT)	HPF30_0838
N/D							-	III M	HPF30_1273
N/D							-	II M (5’-GGCC)	HPF30_0482
N/D							-	II M	HPF30_0058
N/D							-	II M	HPF30_1426
Truncated genes: I S(HPF30_0541-542), II M(5'-GAAGG)(HPF30_1247), III M(HPF30_1393-1394), IIG RM(HPF30_0047-0049), IIG S(HPF30_1338-1339), II M(5'-ACNGT)(HPF30_0840), II M(5'-CCATC)(HPF30_1368-1369)
(D) F32
5'-ACANNNNNNRTAY	342	97.9943		344	98.5673	349	-	I S (Group 2)	HPF32_0757	TRD combination: f, d
5'-RTAYNNNNNNTGT	342	97.9943		342	97.9943	349	-	I S (Group 2)	HPF32_0757	Complement with 5'-ACANNNNNNRTAY
5'-GAYNNNNNRTAY	566	97.5862		571	98.4483	580	-	I S (Group 2)	HPF32_0814	TRD combination: e, d
5'-RTAYNNNNNRTC	566	97.5862		574	98.9655	580	-	I S (Group 2)	HPF32_0814	Complement with 5'-GAYNNNNNRTAY
5'-CRTANNNNNNNTC	670	99.1124		667	98.6686	676	-	I S (Group 3)	HPF32_1419	TRD combination: k, o
5'-GANNNNNNNTAYG	669	98.9645		667	98.6686	676	-	I S (Group 3)	HPF32_1419	Complement with 5'-CRTANNNNNNNTC
5'-GTNNAC	523	99.4297		520	98.8593	526	M.hpyAIX	II M (5’-GTNNAC)	HPF32_0444
5'-GANTC	5166	99.0794		5175	99.252	5214	M.hpyAIV	II M (5’-GANTC)	HPF32_0049
5'-GTAC	194	98.9796		195	99.4898	196	M.hpyAXII	II M (5’-GTAC)	HPF32_0484
5'-GATC	9861	98.768		9891	99.0685	9984	M.hpyAIII	II M (5’-GATC)	HPF32_0104
5'-TCNNGA	3706	97.8353		3720	98.2049	3788	-	II M (5’-TCNNGA)	HPF32_1023
5'-TGCA	10945	97.4969		10971	97.7285	11226	-	II M (5’-TGCA)	HPF32_1440
5'-ATTAAT	776	96.5174		769	95.6468	804	M.hpyAVII	II M (5’-ATTAAT)	HPF32_0853
5'-GRRGA	8016	90.5865		8045	90.9142	8849	M1.hpyAII	II M (5’-GAAGA)	HPF32_0034
5'-CCGG	2819	84.8585		2944	88.6213	3322	-	II M (5’-CCGG)	HPF32_0272
5'-TCTTC	3963	86.7367		4086	89.4288	4569	M2.hpyAII	II M (5’-GAAGA)	HPF32_0033
5'-GAGG	4508	97.9361		4521	98.2186	4603	M1.hpyAVI	II M1(5’-GRRG)	HPF32_0059
5'-GATGG	2159	97.9138		2173	98.5488	2205	-	II M (5’-GATGG)	HPF32_1386
5'-CATG	12955	90.9506		13214	92.7689	14244	M.hpyAI	II M (5’-CATG)	HPF32_1140
5'-GCGCGC	126	23.5075		110	20.5224	536	M.hpy99III	II M (5’-GCGC)	HPF32_1057
5'-TCGA	536	98.5294		529	97.2426	544	M.hpyAX	III M (5’-TCGA)	HPF32_0269
5'-RGANNNNNNNTCY	1827	98.5437		1830	98.7055	1854			Unassigned	Palindromic
5'-RGANNNNNNNTAY	920	43.5606		923	43.7027	2112			Unassigned
5'-RTANNNNNNNTCY	585	27.6989		584	27.6515	2112			Unassigned	Complement with 5'-RGANNNNNNNTAY
5'-CCRAG	2970	98.3769		2981	98.7413	3019			Unassigned
5'-CCTMCA	376	44.9223		452	54.0024	837			Unassigned
N/D							-	I S (Group 1)	HPF32_0871
N/D							-	IIG RM	HPF32_1404
N/D							-	IIG RM	HPF32_0048
N/D							-	IIG S	HPF32_1358
N/D							-	IIG RM	HPF32_1359
N/D							M2.hpyAVI	II M2 (5’-CCTC)	HPF32_0060
N/D							M.hpy99XI	II M (5’-ACGT)	HPF32_0850
N/D							-	III M	HPF32_1291
N/D							-	II M (5’-CCATC)	HPF32_1387
N/D							-	II M (5’-GCNGC)	HPF32_0953
N/D							-	II M (5’-GGCC)	HPF32_0816
N/D							-	II M	HPF32_1268
Truncated genes: IIG RM(HPF32_0650-0652), III M(HPF32_1407-1408)
(E) F57
5'-GAANNNNNNRTC	1439	98.4268		1417	96.922	1462	-	I S (Group 2)	HPF57_0869	TRD combination: c, e
5'-GAYNNNNNNTTC	1446	98.9056		1435	98.1532	1462	-	I S (Group 2)	HPF57_0869	Complement with 5'-GAANNNNNNRTC
5'-CCANNNNNNNNTTC	646	98.0273		632	95.9029	659	-	I S (Group 2)	HPF57_0810	TRD combination: a, c
5'-GAANNNNNNNNTGG	648	98.3308		630	95.5994	659	-	I S (Group 2)	HPF57_0810	Complement with 5'-CCANNNNNNNNTTC
5'-CTRYAG	1261	99.2913		1254	98.7402	1270	-	II M (5’-CTRYAG)	HPF57_1130
5'-GANTC	5363	98.9118		5322	98.1557	5422	M.hpyAIV	II M (5’-GANTC)	HPF57_0049
5'-GTAC	194	98.9796		190	96.9388	196	M.hpyAXII	II M (5’-GTAC)	HPF57_0534
5'-TCNNGA	3826	97.7017		3813	97.3698	3916	-	II M (5’-TCNNGA)	HPF57_1048
5'-TGCA	11126	97.4597		11026	96.5837	11416	-	II M (5’-TGCA)	HPF57_1467
5'-GAGG	4466	96.7924		4415	95.687	4614	M1.hpyAVI	II M1(5’-GRRG)	HPF57_0060
5'-ATTAAT	823	95.4756		810	93.9675	862	M.hpyAVII	II M (5’-ATTAAT)	HPF57_0507
5'-CTNAG	5329	94.2852		5266	93.1706	5652	M.hpyHI	II M (5’-CTNAG)	HPF57_0366
5'-CCGG	2988	88.9286		2949	87.7679	3360	-	II M (5’-CCGG)	HPF57_0316
5'-CATG	12996	91.0722		12746	89.3203	14270	M.hpyAI	II M (5’-CATG)	HPF57_1170
5'-GTNNAC	142	29.2181		129	26.5432	486	M.hpyAIX	II M (5’-GTNNAC)	HPF57_0920	Untruncated ORF but rare methylation. Explained by 5'-TGCA methylation
5'-CCANNNNNNTAA	1177	95.7689		1150	93.572	1229			Unassigned
5'-TTANNNNNNTGG	1176	95.6876		1139	92.677	1229			Unassigned	Complement with 5'-CCANNNNNNTAA
5'-RCTANNNNNNTAA	247	36.976		227	33.982	668			Unassigned
5'-TTANNNNNNTAGY	243	36.3772		214	32.0359	668			Unassigned	Complement with 5'-RCTANNNNNNTAA
5'-GAASC	4119	98.3524		4099	97.8749	4188			Unassigned
5'-CCTCTAG	83	85.567		92	94.8454	97			Unassigned
N/D							-	I S (Group 1)	HPF57_0489
N/D							M.hpy99III	II M (5’-GCGC)	HPF57_1084
N/D							-	III M	HPF57_0034
N/D							-	I S (Group 3)	HPF57_1447
N/D							-	II M (5’-GGNNCC)	HPF57_0711
N/D							-	IIG S	HPF57_1386
N/D							-	IIG RM	HPF57_1387
N/D							M2.hpyAVI	II M2 (5’-CCTC)	HPF57_0061
N/D							M.hpy99XI	II M (5’-ACGT)	HPF57_0513
N/D							-	III M	HPF57_1320
N/D							-	II M (5’-GCNGC)	HPF57_0406
N/D							-	II M	HPF57_1297
Truncated genes: II M(5'-GATC)(HPF57_0142-0143), II M(5'-TCGA)(HPF57_0278,0312), IIG RM(HPF57_0690-0692), IIG RM(HPF57_1430-1431), III M(HPF57_1434-1435), IIG RM(HPF57_0047-0048), II M(5'-ACNGT)(HPF57_0510-0511)
(F) HPYF1
5'-GRNAANNNNNNNTAYC	175	92.5926		187	98.9418	189	-	I S (Group 3)	HPP12_1508	TRD combination: m, n
5'-GRTANNNNNNNTTNYC	180	95.2381		186	98.4127	189	-	I S (Group 3)	HPP12_1508	Complement with 5'-GRNAANNNNNNNTAYC
5'-GTAC	259	97.3684		262	98.4962	266	M.hpyAXII	II M (5’-GTAC)	HPP12_0510
5'-GAATTC	341	96.3277		345	97.4576	354	-	II M (5’-GAATTC)	HPP12_1389
5'-GATC	10174	96.2353		10378	98.165	10572	M.hpyAIII	II M (5’-GATC)	HPP12_0095
5'-GAAGG	1280	95.952		1308	98.051	1334	M.hpyAV	II M (5’-GAAGG)	HPP12_0048
5'-TCNNGA	3781	95		3867	97.1608	3980	-	II M (5’-TCNNGA)	HPP12_1052
5'-GAGG	4604	94.5768		4720	96.9597	4868	M1.hpyAVI	II M1(5’-GAGG)	HPP12_0044
5'-ATTAAT	886	92.2917		904	94.1667	960	M.hpyAVII	II M (5’-ATTAAT)	HPP12_0488
5'-CATG	12852	86.9318		13308	90.0162	14784	M.hpyAI	II M (5’-CATG)	HPP12_1173
5'-GNGRGA	3816	95.0436		3897	97.061	4015			Unassigned
5'-GACC	2448	94.0092		2532	97.235	2604			Unassigned
5'-GCGCGC	142	28.0632		144	28.4585	506			Unassigned
5'-TCGA	213	36.5979		216	37.1134	582	M.hpyAX	III M (5’-TCGA)	HPP12_0259	Untruncated ORF but rare methylation. Explained by 5'-GATC methylation
N/D							-	II M (5’-CCGG)	HPP12_0262
N/D							M.hpy99III	II M (5’-GCGC)	HPP12_1087
N/D							-	I S (Group 1)	HPP12_0434
N/D							M.hpyAIX	II M (5’-GTNNAC)	HPP12_0908
N/D							-	III M	HPP12_1365
N/D							-	IIG RM	HPP12_1494
N/D							-	III M	HPP12_1497
N/D							-	IIG S	HPP12_1449
N/D							-	IIG RM	HPP12_1450
N/D							M2.hpyAVI	II M2 (5’-CCTC)	HPP12_0045
N/D							-	III M	HPP12_1377
N/D							-	II M (5’-TGCA)	HPP12_1523
Truncated genes: I S(HPP12_0849), II M (5'-GANTC)(HPP12_1318), IIG RM(HPP12_0680-0682), IIG RM(HPP12_1319, unannoteted region between HPP12_1353 and HPP12_1354), II M (5'-ACGT)(HPP12_0491), III M (5'-GCAG)(HPP12_600)
(G) HPYF2
5'-GAANNNNNNNNTAG	755	96.6709		733	93.854	781	-	I S (Group 2)	HPP12_0797	TRD combination: c, a
5'-CTANNNNNNNNTTC	756	96.799		737	94.3662	781	-	I S (Group 2)	HPP12_0797	Complement with 5'-GAANNNNNNNNTAG
5'-GRNAANNNNNNNTAYC	180	95.2381		172	91.0053	189	-	I S (Group 3)	HPP12_1508	TRD combination: m, n
5'-GRTANNNNNNNTTNYC	186	98.4127		183	96.8254	189	-	I S (Group 3)	HPP12_1508	Complement with 5'-GRNAANNNNNNNTAYC
5'-GATC	10320	97.6163		9979	94.3908	10572	M.hpyAIII	II M (5’-GATC)	HPP12_0095
5'-GAAGG	1303	97.6762		1256	94.1529	1334	M.hpyAV	II M (5’-GAAGG)	HPP12_0048
5'-GAATTC	341	96.3277		333	94.0678	354	-	II M (5’-GAATTC)	HPP12_1389
5'-TCNNGA	3818	95.9296		3689	92.6884	3980	-	II M (5’-TCNNGA)	HPP12_1052
5'-GTAC	258	96.9925		253	95.1128	266	M.hpyAXII	II M (5’-GTAC)	HPP12_0510
5'-GAGG	4648	95.4807		4509	92.6253	4868	M1.hpyAVI	II M1(5’-GAGG)	HPP12_0044
5'-ATTAAT	894	93.125		866	90.2083	960	M.hpyAVII	II M (5’-ATTAAT)	HPP12_0488
5'-CATG	13127	88.7919		12421	84.0165	14784	M.hpyAI	II M (5’-CATG)	HPP12_1173
5'-GNGRGA	3879	96.6127		3760	93.6488	4015			Unassigned
5'-GACC	2503	96.1214		2407	92.4347	2604			Unassigned
5'-GCGCGC	165	32.6087		139	27.4704	506			Unassigned
5'-TCGA	204	35.0515		203	34.8797	582	M.hpyAX	III M (5'-TCGA)	HPP12_0259	Untruncated ORF but rare methylation. Explained by 5'-GATC methylation
N/D							-	II M (5'-CCGG)	HPP12_0262
N/D							M.hpy99III	II M (5'-GCGC)	HPP12_1087
N/D							-	I S (Group 1)	HPP12_0434
N/D							M.hpyAIX	II M (5'-GTNNAC)	HPP12_0908
N/D							-	III M	HPP12_1365
N/D							-	IIG RM	HPP12_1494
N/D							-	III M	HPP12_1497
N/D							-	IIG S	HPP12_1449
N/D							-	IIG RM	HPP12_1450
N/D							M2.hpyAVI	II M2 (5'-CCTC)	HPP12_0045
N/D							-	III M	HPP12_1377
N/D							-	II M (5'-TGCA)	HPP12_1523
Truncated genes: I S(HPP12_0849), II M (5'-GANTC)(HPP12_1318), IIG RM(HPP12_0680-0682), IIG RM(HPP12_1319, unannoteted region between HPP12_1353 and HPP12_1354), II M (5'-ACGT)(HPP12_0491), III M (5'-GCAG)(HPP12_600)
a Methylated base is underlined.
b Threshold value of IPD (inter-pulse duration) score is as follows: P12 #1, 37, #2, 39; F16 #1, 29, #2, 30; F30 #1, 33, #2, 32; F32 #1, 32, #2, 33; F57 #1, 39, #2, 36; HPYF1 #1, 33, #2, 37; HPYF2 #1, 33, #2, 32;
